# Supplementary material for: Chromosome microduplication in somatic cells decreases the genetic stability of human reprogrammed somatic cells and results in pluripotent stem cells
Source: PubMed Central journal article supplement (PMC4428033; doi:10.1038/srep10114), 2015-05-12

1 **Chromosome microduplication in somatic cells decreases the genetic stability of**  
2 **human reprogrammed somatic cells and resulted pluripotent stem cells**

3

4 Yang Yu<sup>1,2,3 #</sup>, Liang Chang<sup>1 #</sup>, Hongcui Zhao<sup>1</sup>, Rong Li<sup>1,2,3</sup>, Yong Fan<sup>4</sup>, Jie Qiao<sup>1,2,3 \*</sup>

5

6 1 Center of Reproductive Medicine, Department of Obstetrics and Gynecology,  
7 Peking University Third Hospital, Beijing, 100191, China

8 2 Key Laboratory of Assisted Reproduction, Ministry of Education, Beijing, 100191,  
9 China

10 3 Beijing Key Laboratory of Reproductive Endocrinology and Assisted Reproductive  
11 Technology, Beijing, 100191, China

12 4 Key Laboratory for Major Obstetric Diseases of Guangdong Province, the Third  
13 Affiliated Hospital of Guangzhou Medical University, Guangzhou, 510150, China

14

15 # These authors contributed equally to this work.

16 \* Corresponding authors

17 Jie Qiao, M.D, Ph.D.

18 Mailing address: Department of Obstetrics and Gynecology, Peking University Third  
19 Hospital, No. 49 HuaYuan North Road, HaiDian District, Beijing 100191, the  
20 People's Republic of China

21 Tel:/Fax: +86-10- 82265080

22 E-mail: jie.qiao@263.net

23

24

25 **Supplementary figure legends**

26 **Figure S1** Enlarged image for chromosome dup(1) (q21.1q21.2) of somatic cells from  
27 donor 2. The scattered blue points in the left picture indicate the duplication in  
28 chromosome 1, and the rectangle in the right picture shows all of the genes in the  
29 duplicated region.

30 **Figure S2** Expression of apoptosis-related genes and chromosome euploidy in  
31 arrested primary colonies during episomal-mediated iPS induction from different  
32 somatic cells. (A) Significantly higher numbers of arrested colonies from  
33 episomal-mediated iPS-S2 showed aneuploidy when compared with colonies from  
34 episomal-mediated iPS-S1 and episomal-mediated iPS-S3; (B) Increased expression  
35 of p53 and Bax and decreased expression of Bcl-2 were observed in arrested colonies  
36 from S2 somatic cells, but these differences were less than two-fold; (C) p53 gene  
37 expression levels were positively correlated with chromosome aneuploidy in arrested  
38 colonies during episomal-mediated iPS induction; (D) Significant increases in p53  
39 and Bax and significant decreases in Bcl-2 gene expression were observed in arrested  
40 primary colonies with aneuploid chromosomes compared with those with euploid  
41 chromosomes; \*\*  $P < 0.01$ .

42

43 Table S1 Summary of chromosome karyotyping in blood cells, fibroblast cells at  
 44 passage 3 and at passage 10 from S1, S2 and S3 donors

| Cells                      | Cytogenetic method | SNP method                          |
|----------------------------|--------------------|-------------------------------------|
| S1 blood cells             | Normal             | Normal                              |
| S2 blood cells             | Normal             | Normal                              |
| S3 blood cells             | Normal             | Normal                              |
| S1 fibroblast cells at P3* | Normal             | Normal                              |
| S2 fibroblast cells at P3  | Normal             | Normal                              |
| S3 fibroblast cells at P3  | Normal             | Normal                              |
| S1 fibroblast cells at P10 | Normal             | Normal                              |
| S2 fibroblast cells at P10 | Normal             | Chromosomes 1<br>dup(1)(q21.2q21.2) |
| S3 fibroblast cells at P10 | Normal             | Normal                              |

45 \*P3 means passage 3, and P10 means passage 10.

46 Table S2 Summary of 24 genes located at chromosome 1 (q21.1)

| No. | Genes     | No. | Genes     |
|-----|-----------|-----|-----------|
| 1   | GJA8      | 2   | GPR89B    |
| 3   | GPR89C    | 4   | PDZK1     |
| 5   | LOC200030 | 6   | NBPF11    |
| 7   | FLJ39739  | 8   | PPIAL4B   |
| 9   | PPIAL4A   | 10  | NBPF14    |
| 11  | PPIAL4F   | 12  | NBPF15    |
| 13  | NBPF15    | 14  | NBPF16    |
| 15  | PPIAL4E   | 16  | NBPF16    |
| 17  | PPIAL4F   | 18  | LOC645166 |
| 19  | LOC645166 | 20  | LOC388692 |
| 21  | FCGR1C    | 22  | HIST2H2BF |
| 23  | PPIAL4B   | 24  | LOC728855 |

48 Table S3 Chromosome 1 detection using next generation sequencing method

| <b>Sample</b> | <b>Result1</b> | <b>Result2</b>     | <b>Size (Kb)</b> | <b>Copy Number Variation (CNV)</b>               | <b>Gain/Loss</b> |
|---------------|----------------|--------------------|------------------|--------------------------------------------------|------------------|
| S1-1          | 46,XY          | Normal             | Normal           | Normal                                           | Normal           |
| S1-2          | 46,XY          | Normal             | Normal           | Normal                                           | Normal           |
| S2-1          | 46,XY          | Dup(1)(q21.1q21.2) | 2510             | Seq 1q21.1-1q21.2<br>(142600000-145110000)<br>×3 | Duplication      |
| S2-2          | 46,XY          | Dup(1)(q21.1q21.2) | 2410             | Seq 1q21.1-1q21.2<br>(142520000-144930000)<br>×3 | Duplication      |
| S3-1          | 46,XY          | Normal             | Normal           | Normal                                           | Normal           |
| S3-2          | 46,XY          | Normal             | Normal           | Normal                                           | Normal           |

49 Each sample were repeatedly sequenced twice.

50 Normal means that no micro-defects were observed in Chromosome 1.

51

52 Table S4 Summary of chromosome deletion/duplication in the established pluripotent  
53 stem cell lines

---

| Cell lines   | Passage 10 |          | Passage 30 |          |
|--------------|------------|----------|------------|----------|
|              | Aneuploidy | Euploidy | Aneuploidy | Euploidy |
| hES-F1       | 0          | 5        | 0          | 5        |
| hES-F2       | 0          | 5        | 0          | 5        |
| virus-iPS-S1 | 0          | 5        | 0          | 5        |
| virus-iPS-S2 | 1          | 4        | 3          | 2        |
| virus-iPS-S3 | 0          | 5        | 1          | 4        |

---

55 Table S5 Primer sets used for real-time PCR

---

| Gene           | Primer Sets(5' to 3')                                                            |
|----------------|----------------------------------------------------------------------------------|
| P53            | Forward: 5'-GGAAATTTGTATCCCGAGTATCTG-3'<br>Rev: 5'-GTCTTCCAGTGTGATGATGGTAA-3'    |
| Bax            | Forward: 5'-AGTAACATGGAGCTGCAGAGG-3'<br>Rev: 5'-ATGGTTCTGATCAGTTCCGG-3'          |
| Bcl2           | Forward: 5'-GTGACTTCCGATCAGGAAGG-3'<br>Rev: 5'-CTTCCAGACATTCGGAGACC-3'           |
| NF68KD         | Forward: 5'- TCCCCTGAAGAAATTGGTTAAAAT-3'<br>Rev: 5'- GAGTGAAATGGCACGATACCTA-3'   |
| HBZ            | Forward: 5'- CTGACCAAGACTGAGAGGAC -3'<br>Rev: 5'- ATGTCGTCGATGCTCTTCAC -3'       |
| albumin        | Forward: 5'- TGCTTGAATGTGCTGATGACAGGG-3'<br>Rev: 5'- AAGGCAAGTCAGCAGCCATCTCAT-3' |
| $\beta$ -actin | Forward: 5'-GGGAGAAATGGTGGGCG-3'<br>Reverse: 5'-GCCAGTCTGGGATCGTCATC-3'          |

---

8938159090\_R01C01

B Allele Freq

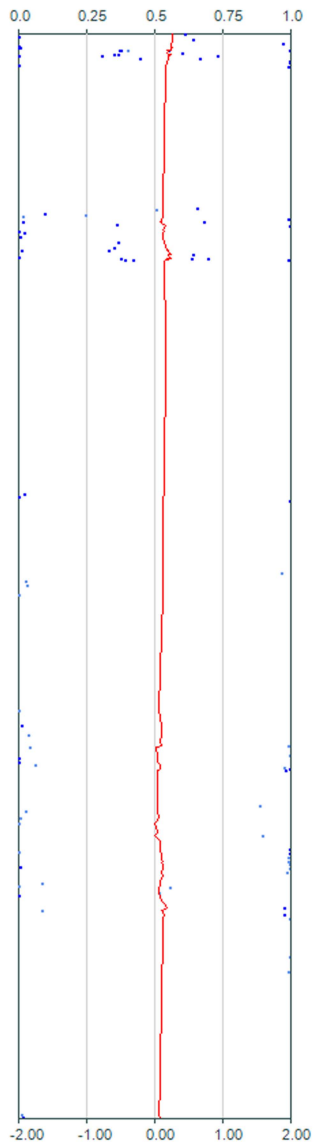

Smoothed Log R

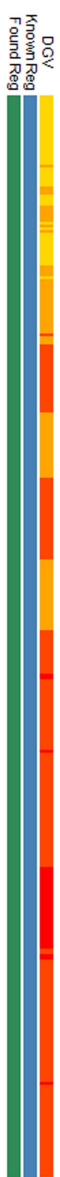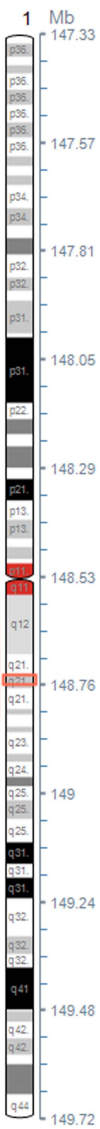

# PDZK1  
 H GPR89C  
 H GPR89B  
 K GJA8  
 NBP11  
 NBP14  
 PPIAL4A  
 PPIAL4B  
 FLJ39739  
 PPIAL4F  
 PPIAL4D  
 NBP16  
 NBP15  
 NBP15  
 PPIAL4E  
 PPIAL4E  
 PPIAL4D  
 PPIAL4F  
 LOC645166  
 LOC645166  
 LOC645168  
 LOC388892  
 FCGR1C  
 HIST2BF  
 PPIAL4C  
 PPIAL4A  
 PPIAL4D  
 PPIAL4B



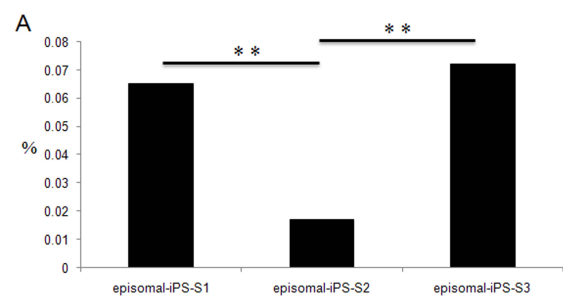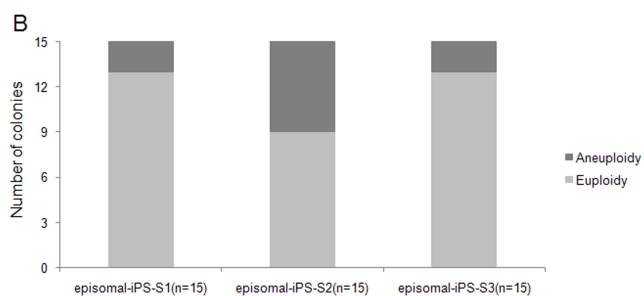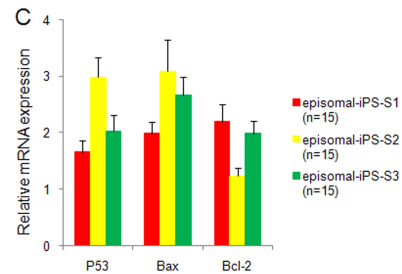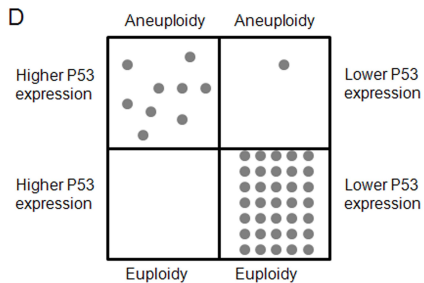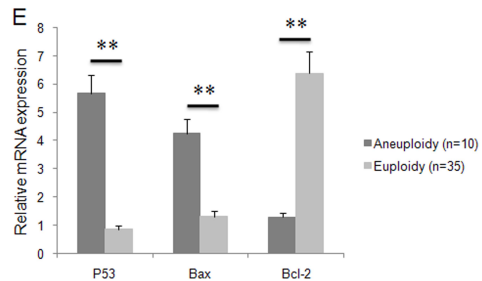

Supplement: srep10114-s1.pdf [file srep10114-s1.pdf]
